# Supplementary material
Source: PubMed Central journal article supplement (PMC8781142)

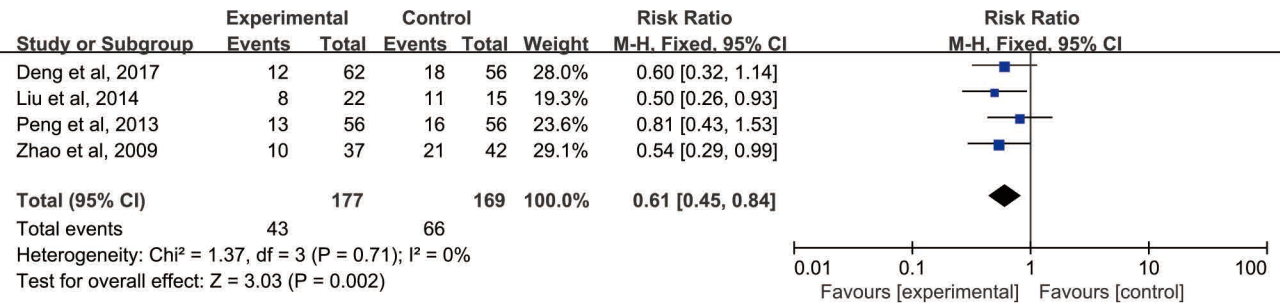

Supplement: 12871_2021_1545_MOESM5_ESM.pdf [file 12871_2021_1545_MOESM5_ESM.pdf]
